# Supplementary material
Source: PubMed Central journal article supplement (PMC4557541)
Supplement: NIHMS64346-supplement-2.pdf [file NIHMS64346-supplement-2.pdf]

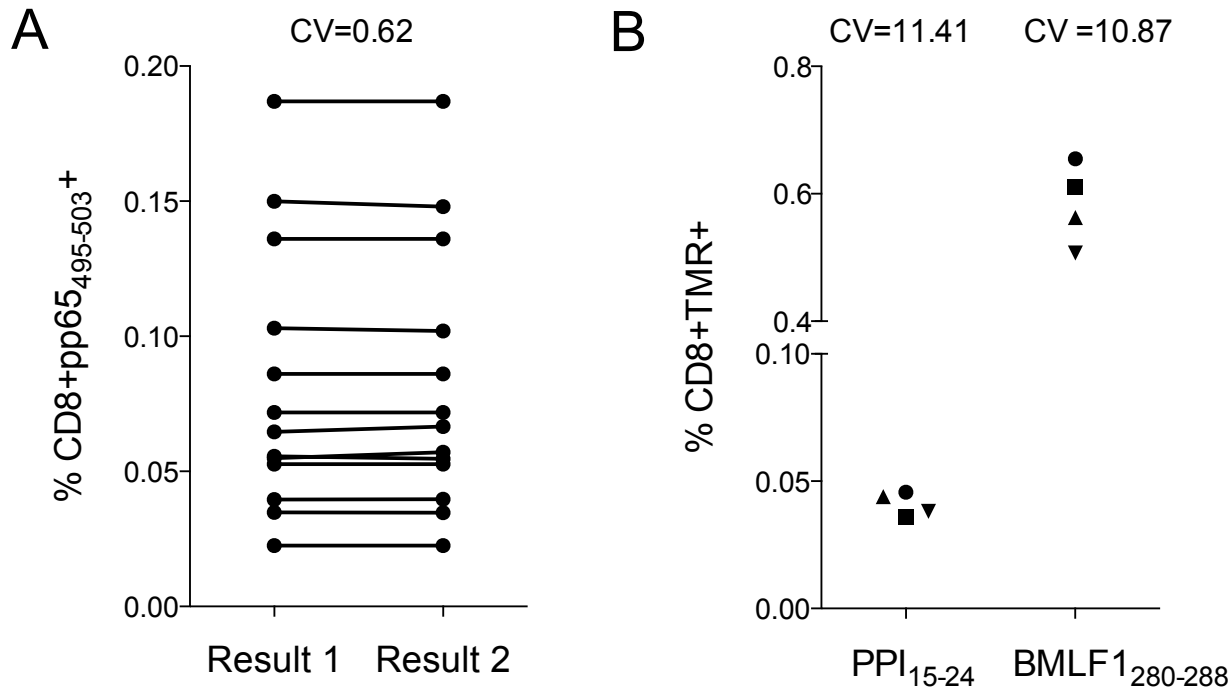

**Supplementary Figure 2.** Quality control. *A*: Intra-assay variability was assessed by repeated measurements of tetramer-binding frequencies separated by intervals of more than one month. Different aliquots of cryopreserved PBMCs drawn from the same donor at the same time point were used for paired evaluations ( $n=13$ ). *B*: Inter-assay variability was assessed across specificities as the coefficient of variation. Data points represent time-separated measurements ( $n=4$ ) of tetramer-binding cells in different aliquots of cryopreserved PBMCs drawn from the same donor at the same time point.
